# Supplementary material
Source: PubMed Central journal article supplement (PMC3972036)
Supplement: NIHMS564487-supplement-Suppl-2.pdf [file NIHMS564487-supplement-Suppl-2.pdf]

**Supplementary Table 1:** Multivariate analyses of the associations between frequency of GERD<sup>1</sup> symptoms and **incident** Barrett's esophagus

| Frequency of GERD symptoms         | Primary care      |                   | OR <sup>2</sup> (95% CI) |              |
|------------------------------------|-------------------|-------------------|--------------------------|--------------|
|                                    | BE cases<br>n (%) | controls<br>n (%) |                          |              |
| Ever                               |                   |                   |                          |              |
| No                                 | 34 (18.4)         | 241 (53.9)        | 1.00                     | (Ref)        |
| Yes                                | 151 (81.6)        | 206 (46.1)        | 5.31                     | (3.48, 8.09) |
| At age 10-19 y                     |                   |                   |                          |              |
| Never symptoms                     | 34 (18.4)         | 241 (53.9)        | 1.00                     | (Ref)        |
| ≥ 1 time per month                 | 5 (2.7)           | 0 (0.0)           | -                        | -            |
| 1 time per week                    | 5 (2.7)           | 0 (0.0)           | -                        | -            |
| > 1 time per week                  | 6 (3.2)           | 3 (0.7)           | 16.7                     | (3.87, 71.8) |
| No symptoms <sup>3</sup>           | 135 (73.0)        | 203 (45.4)        | 4.83                     | (3.15, 7.40) |
| At age 20-29 y                     |                   |                   |                          |              |
| Never symptoms                     | 34 (18.4)         | 241 (53.9)        | 1.00                     | (Ref)        |
| ≥ 1 time per month                 | 9 (4.9)           | 8 (1.8)           | 8.34                     | (2.94, 23.7) |
| 1 time per week                    | 8 (4.3)           | 8 (1.8)           | 6.36                     | (2.21, 18.3) |
| > 1 time per week                  | 20 (10.8)         | 9 (2.0)           | 18.5                     | (7.62, 44.9) |
| No symptoms <sup>3</sup>           | 114 (61.6)        | 181 (40.5)        | 4.56                     | (2.95, 7.05) |
| At age 30-49 y                     |                   |                   |                          |              |
| Never symptoms                     | 34 (18.4)         | 241 (53.9)        | 1.00                     | (Ref)        |
| ≥ 1 time per month                 | 15 (8.1)          | 34 (7.6)          | 3.28                     | (1.60, 6.73) |
| 1 time per week                    | 15 (8.1)          | 26 (5.8)          | 4.35                     | (2.06, 9.19) |
| > 1 time per week                  | 74 (40.0)         | 59 (13.2)         | 9.65                     | (5.74, 16.2) |
| No symptoms <sup>3</sup>           | 47 (25.4)         | 87 (19.5)         | 3.84                     | (2.30, 6.40) |
| At age 50-79 y                     |                   |                   |                          |              |
| Never symptoms                     | 34 (18.4)         | 241 (53.9)        | 1.00                     | (Ref)        |
| ≥ 1 time per month                 | 16 (8.6)          | 49 (11.0)         | 2.41                     | (1.23, 4.72) |
| 1 time per week                    | 23 (12.4)         | 37 (8.3)          | 4.52                     | (2.38, 8.61) |
| > 1 time per week                  | 83 (44.9)         | 94 (21.0)         | 6.52                     | (4.06, 10.5) |
| No symptoms <sup>3</sup>           | 29 (15.7)         | 26 (5.8)          | 8.00                     | (4.06, 15.7) |
| 10 years prior to diagnosis        |                   |                   |                          |              |
| Never symptoms                     | 34 (18.4)         | 241 (53.9)        | 1.00                     | (Ref)        |
| ≥ 1 time per month                 | 14 (7.6)          | 46 (10.3)         | 2.20                     | (1.09, 4.45) |
| 1 time per week                    | 23 (12.4)         | 33 (7.4)          | 5.07                     | (2.64, 9.75) |
| > 1 time per week                  | 93 (50.3)         | 100 (22.4)        | 6.86                     | (4.29, 10.9) |
| No symptoms <sup>3</sup>           | 21 (11.3)         | 27 (6.0)          | 5.65                     | (2.84, 11.3) |
| Frequency of GERD and age at onset |                   |                   |                          |              |
| Never symptoms                     | 34 (18.4)         | 241 (53.9)        | 1.00                     | (Ref)        |
| ≥ weekly age < 30 y                | 31 (16.7)         | 18 (4.0)          | 13.1                     | (6.54, 26.3) |
| ≥ weekly age 30-49 y               | 58 (31.4)         | 69 (15.4)         | 6.19                     | (3.67, 10.4) |
| ≥ weekly age 50-79 y               | 47 (25.4)         | 72 (16.1)         | 4.70                     | (2.79, 7.91) |
| < weekly age < 30 y                | 5 (2.7)           | 6 (1.3)           | 6.07                     | (1.72, 21.5) |
| < weekly age 30-49 y               | 4 (2.2)           | 21 (4.7)          | 1.37                     | (0.44, 4.28) |
| < weekly age 50-79 y               | 6 (3.2)           | 20 (4.5)          | 2.22                     | (0.82, 6.02) |

BE, Barrett's esophagus; GERD, gastroesophageal reflux disease.

<sup>1</sup> Highest reported symptoms of either heartburn or acid regurgitation.

<sup>2</sup> Adjusted for age, sex, highest level of education, cumulative smoking history, body mass index, alcohol intake, and use of aspirin or non-steroidal anti-inflammatory drugs.

<sup>3</sup> Symptoms were present at other age intervals.

**Supplementary Table 2:** Multivariate analyses of the association between severity of pain from GERD<sup>1</sup> and incident Barrett's esophagus

| Severity of pain from GERD                  | Primary care      |                   | OR <sup>2</sup> (95% CI) |
|---------------------------------------------|-------------------|-------------------|--------------------------|
|                                             | BE cases<br>n (%) | controls<br>n (%) |                          |
| Ever                                        |                   |                   |                          |
| Never symptoms                              | 34 (18.5)         | 241 (53.9)        | 1.00 (Ref)               |
| Mild                                        | 22 (11.9)         | 67 (15.0)         | 2.30 (1.25, 4.23)        |
| Moderate                                    | 55 (29.9)         | 89 (19.9)         | 4.63 (2.80, 7.66)        |
| Severe                                      | 73 (39.7)         | 50 (11.2)         | 11.2 (6.61, 18.9)        |
| At age 10-19 y                              |                   |                   |                          |
| Never symptoms                              | 34 (30.6)         | 241 (63.2)        | 1.00 (Ref)               |
| Mild                                        | 8 (7.2)           | 0 (0.0)           | -                        |
| Moderate                                    | 7 (6.3)           | 3 (0.8)           | 19.0 (4.57, 79.2)        |
| Severe                                      | 2 (1.8)           | 0 (0.0)           | -                        |
| No symptoms <sup>3</sup>                    | 60 (54.1)         | 137 (36.0)        | 3.20 (1.98, 5.16)        |
| At age 20-29 y                              |                   |                   |                          |
| Never symptoms                              | 34 (27.9)         | 241 (61.3)        | 1.00 (Ref)               |
| Mild                                        | 11 (9.0)          | 11 (2.8)          | 11.3 (4.80, 26.8)        |
| Moderate                                    | 16 (13.1)         | 11 (2.8)          | 11.6 (4.84, 27.6)        |
| Severe                                      | 5 (4.1)           | 3 (0.8)           | 13.0 (2.87, 58.6)        |
| No symptoms <sup>3</sup>                    | 56 (45.9)         | 127 (32.3)        | 3.19 (1.97, 5.18)        |
| At age 30-49 y                              |                   |                   |                          |
| Never symptoms                              | 34 (20.3)         | 241 (56.6)        | 1.00 (Ref)               |
| Mild                                        | 23 (13.8)         | 51 (12.0)         | 3.30 (1.78, 6.13)        |
| Moderate                                    | 43 (25.7)         | 44 (10.3)         | 7.68 (4.29, 13.8)        |
| Severe                                      | 37 (22.2)         | 23 (5.4)          | 11.8 (6.10, 22.7)        |
| No symptoms <sup>3</sup>                    | 30 (18.0)         | 67 (15.7)         | 3.10 (1.76, 5.47)        |
| At age 50-79 y                              |                   |                   |                          |
| Never symptoms                              | 34 (19.2)         | 241 (54.8)        | 1.00 (Ref)               |
| Mild                                        | 21 (11.9)         | 61 (13.9)         | 2.38 (1.27, 4.43)        |
| Moderate                                    | 47 (26.6)         | 84 (19.1)         | 4.18 (2.49, 7.02)        |
| Severe                                      | 53 (29.9)         | 33 (7.5)          | 12.1 (6.79, 21.7)        |
| No symptoms <sup>3</sup>                    | 22 (12.4)         | 21 (4.8)          | 8.05 (3.79, 17.1)        |
| Severity of pain from GERD and age at onset |                   |                   |                          |
| Never symptoms                              | 34 (18.5)         | 241 (53.9)        | 1.00 (Ref)               |
| Severe GERD < 30y                           | 5 (2.7)           | 3 (0.7)           | 12.3 (2.73, 55.6)        |
| Severe GERD 30-49y                          | 34 (18.5)         | 21 (4.7)          | 12.0 (6.09, 23.7)        |
| Severe GERD 50-79y                          | 34 (18.5)         | 26 (5.8)          | 10.4 (5.45, 19.9)        |
| Less severe GERD < 30y                      | 20 (10.9)         | 20 (4.5)          | 7.64 (3.67, 15.9)        |
| Less Severe GERD 30-49y                     | 34 (18.5)         | 65 (14.5)         | 3.98 (2.26, 7.01)        |
| Less Severe GERD 50-79y                     | 23 (12.5)         | 71 (15.9)         | 2.24 (1.23, 4.09)        |

BE, Barrett's esophagus; GERD, gastroesophageal reflux disease.

<sup>1</sup> Highest severity of pain from either heartburn or acid regurgitation.

<sup>2</sup> Adjusted for age, sex, highest level of education, cumulative smoking history, body mass index, alcohol intake, and use of aspirin or non-steroidal anti-inflammatory drugs.

<sup>3</sup> Symptoms were present at other age intervals.

**Supplementary Table 3:** Multivariate analyses of the association between cumulative GERD<sup>1</sup> symptom duration (years) and **incident** Barrett's esophagus, overall and within strata of age at onset

| Age at onset of frequent GERD symptoms | Never symptoms   |                          | ≤ 20 years       |                          | > 20 years       |                          | P-trend |
|----------------------------------------|------------------|--------------------------|------------------|--------------------------|------------------|--------------------------|---------|
|                                        | Cases / Controls | OR <sup>2</sup> (95% CI) | Cases / Controls | OR <sup>2</sup> (95% CI) | Cases / Controls | OR <sup>2</sup> (95% CI) |         |
| All                                    | 34/241           | 1.00 (Ref)               | 69/123           | 4.01 (2.51, 6.40)        | 82/83            | 7.49 (4.61, 12.2)        | 0.01    |
| ≥ weekly symptoms <sup>3</sup>         |                  |                          |                  |                          |                  |                          |         |
| Age at onset < 30y                     | 34/241           | 1.00 (Ref)               | 8/10             | 4.02 (1.34, 12.1)        | 18/8             | 24.8 (9.79, 12.1)        | 0.01    |
| Age at onset 30-49y                    | 34/241           | 1.00 (Ref)               | 26/32            | 6.33 (3.20, 12.5)        | 32/37            | 6.05 (3.22, 11.4)        | 0.96    |
| Age at onset 50-79y                    | 34/241           | 1.00 (Ref)               | 22/34            | 4.27 (2.17, 8.40)        | 25/38            | 5.30 (2.75, 10.2)        | 0.66    |

BE, Barrett's esophagus; GERD, gastroesophageal reflux disease.

<sup>1</sup> Number of years with at least weekly heartburn or acid regurgitation symptoms.

<sup>2</sup> Adjusted for age, sex, highest level of education, cumulative smoking history, body mass index, alcohol intake, and use of aspirin or non-steroidal anti-inflammatory drugs.

<sup>3</sup> Numbers do not add to total as the group of participants with infrequent (< weekly) GERD symptoms throughout life were excluded from this analysis.

**Supplementary Table 4:** Odds ratios for Barrett's esophagus associated with frequency of symptoms of GERD<sup>1</sup> combined with BMI category or smoking or NSAID use or PPI use

| Frequency of GERD symptoms | Frequency of GERD combined with BMI |                          |                |                          |                |                          |
|----------------------------|-------------------------------------|--------------------------|----------------|--------------------------|----------------|--------------------------|
|                            | BMI < 25                            |                          | BMI 25-29.9    |                          | BMI ≥ 30       |                          |
|                            | Controls/cases                      | OR <sup>2</sup> (95% CI) | Controls/cases | OR <sup>2</sup> (95% CI) | Controls/cases | OR <sup>2</sup> (95% CI) |
| Never                      | 44/7                                | 1.00 (Ref)               | 86/10          | 0.74 (0.26, 2.11)        | 111/24         | 1.39 (0.55, 3.52)        |
| < weekly                   | 6/3                                 | 3.09 (0.60, 15.8)        | 14/4           | 1.86 (0.47, 7.39)        | 26/12          | 2.92 (1.00, 8.49)        |
| ≥ 1 time per week          | 15/23                               | 9.88 (3.46, 28.2)        | 46/61          | 8.90 (3.63, 21.9)        | 72/68          | 6.12 (2.54, 14.7)        |
| Synergy index (95% CI)     |                                     |                          |                |                          |                | 0.55 (0.24, 1.26)        |

  

| Frequency of GERD symptoms | Frequency of GERD combined with smoking status |                          |                |                          |
|----------------------------|------------------------------------------------|--------------------------|----------------|--------------------------|
|                            | Never smoker                                   |                          | Ever smoker    |                          |
|                            | Controls/cases                                 | OR <sup>3</sup> (95% CI) | Controls/cases | OR <sup>3</sup> (95% CI) |
| Never                      | 65/9                                           | 1.00 (Ref)               | 176/31         | 1.27 (0.57, 2.86)        |
| < weekly                   | 10/7                                           | 5.10 (1.53, 16.9)        | 34/11          | 2.34 (0.87, 6.28)        |
| ≥ 1 time per week          | 33/31                                          | 7.16 (3.01, 17.0)        | 98/121         | 9.26 (4.32, 19.8)        |
| Synergy index (95% CI)     |                                                |                          |                | 1.29 (0.67, 2.48)        |

  

| Frequency of GERD symptoms | Frequency of GERD combined with NSAIDs use |                          |                |                          |
|----------------------------|--------------------------------------------|--------------------------|----------------|--------------------------|
|                            | Did not use NSAIDs                         |                          | Used NSAIDs    |                          |
|                            | Controls/cases                             | OR <sup>4</sup> (95% CI) | Controls/cases | OR <sup>4</sup> (95% CI) |
| Never                      | 91/12                                      | 1.00 (Ref)               | 150/29         | 1.50 (0.72, 3.10)        |
| < weekly                   | 16/4                                       | 1.98 (0.56, 6.97)        | 30/15          | 3.81 (1.59, 9.15)        |
| ≥ 1 time per week          | 50/63                                      | 9.98 (4.87, 20.4)        | 83/89          | 8.48 (4.28, 16.8)        |
| Synergy index (95% CI)     |                                            |                          |                | 0.79 (0.46, 1.36)        |

  

| Frequency of GERD symptoms | Frequency of GERD combined with <i>H. pylori</i> |                          |                |                          |
|----------------------------|--------------------------------------------------|--------------------------|----------------|--------------------------|
|                            | Negative                                         |                          | Positive       |                          |
|                            | Controls/cases                                   | OR <sup>5</sup> (95% CI) | Controls/cases | OR <sup>5</sup> (95% CI) |
| Never                      | 148/27                                           | 1.00 (Ref)               | 87/16          | 0.82 (0.40, 1.69)        |
| < weekly                   | 23/13                                            | 3.19 (1.43, 7.11)        | 21/6           | 1.52 (0.56, 4.17)        |
| ≥ 1 time per week          | 94/132                                           | 8.24 (5.00, 13.6)        | 34/16          | 2.60 (1.26, 5.40)        |
| Synergy index (95% CI)     |                                                  |                          |                | 0.23 (0.08, 0.64)        |

  

| Frequency of GERD symptoms | Frequency of GERD combined with PPIs |                          |                |                          |
|----------------------------|--------------------------------------|--------------------------|----------------|--------------------------|
|                            | Never used PPIs                      |                          | Ever used PPIs |                          |
|                            | Controls/cases                       | OR <sup>5</sup> (95% CI) | Controls/cases | OR <sup>5</sup> (95% CI) |
| Never                      | 228/28                               | 1.00 (Ref)               | 13/13          | 7.68 (3.21, 18.4)        |
| < weekly                   | 39/7                                 | 1.46 (0.59, 3.60)        | 7/12           | 13.9 (5.02, 38.7)        |
| ≥ 1 time per week          | 65/21                                | 2.64 (1.40, 4.99)        | 68/131         | 16.3 (9.91, 26.9)        |
| Synergy index (95% CI)     |                                      |                          |                | 1.84 (0.82, 4.14)        |

BE, Barrett's esophagus; GERD, gastroesophageal reflux disease.

<sup>1</sup> Heartburn or acid regurgitation symptoms in the 10 years prior to diagnosis.

<sup>2</sup> Adjusted for age, sex, education, cumulative smoking history, average alcohol consumption, and use of aspirin or other NSAIDs.

<sup>3</sup> Adjusted for age, sex, education, body mass index, average alcohol consumption, and use of aspirin or other NSAIDs.

<sup>4</sup> Adjusted for age, education, cumulative smoking history, body mass index, and average alcohol consumption.

<sup>5</sup> Adjusted for age, education, cumulative smoking history, body mass index, average alcohol consumption, and use of aspirin or other NSAIDs.

**Supplementary Table 5:** Odds ratios for Barrett’s esophagus associated with duration of symptoms of GERD<sup>1</sup> combined with BMI category or smoking or NSAID use or PPI use

| Duration of GERD symptoms | Duration of GERD combined with BMI              |                          |                |                          |                |                          |
|---------------------------|-------------------------------------------------|--------------------------|----------------|--------------------------|----------------|--------------------------|
|                           | BMI < 25                                        |                          | BMI 25-29.9    |                          | BMI ≥ 30       |                          |
|                           | Controls/cases                                  | OR <sup>2</sup> (95% CI) | Controls/cases | OR <sup>2</sup> (95% CI) | Controls/cases | OR <sup>2</sup> (95% CI) |
| Never                     | 19/3                                            | 1.00 (Ref)               | 58/7           | 0.77 (0.18, 3.30)        | 161/28         | 1.15 (0.32, 4.21)        |
| < 20 years                | 4/8                                             | 12.1 (2.17, 67.2)        | 36/26          | 4.85 (1.28, 18.4)        | 82/51          | 4.08 (1.13, 14.7)        |
| ≥ 20 years                | 1/5                                             | 34.0 (2.72, 425)         | 25/32          | 8.85 (2.32, 33.8)        | 57/64          | 7.75 (2.14, 28.0)        |
| Synergy index (95% CI)    |                                                 |                          |                |                          |                | 0.20 (0.02, 2.04)        |
| Duration of GERD symptoms | Duration of GERD combined with smoking status   |                          |                |                          |                |                          |
|                           | Never smoker                                    |                          | Ever smoker    |                          |                |                          |
|                           | Controls/cases                                  | OR <sup>3</sup> (95% CI) | Controls/cases | OR <sup>3</sup> (95% CI) |                |                          |
| Never                     | 65/9                                            | 1.00 (ref)               | 176/31         | 1.27 (0.56, 2.84)        |                |                          |
| < 20 years                | 31/26                                           | 5.97 (2.48, 14.3)        | 89/61          | 5.05 (2.30, 11.1)        |                |                          |
| ≥ 20 years                | 15/19                                           | 10.4 (3.83, 28.3)        | 66/88          | 10.2 (4.69, 22.4)        |                |                          |
| Synergy index (95% CI)    |                                                 |                          |                |                          |                | 0.96 (0.41, 2.22)        |
| Duration of GERD symptoms | Duration of GERD combined with NSAIDs use       |                          |                |                          |                |                          |
|                           | Did not use NSAIDs                              |                          | Used NSAIDs    |                          |                |                          |
|                           | Controls/cases                                  | OR <sup>4</sup> (95% CI) | Controls/cases | OR <sup>4</sup> (95% CI) |                |                          |
| Never                     | 91/12                                           | 1.00 (Ref)               | 150/29         | 1.50 (0.72, 3.10)        |                |                          |
| < 20 years                | 41/39                                           | 7.38 (3.48, 15.7)        | 82/49          | 4.65 (2.29, 9.42)        |                |                          |
| ≥ 20 years                | 35/40                                           | 9.54 (4.43, 20.5)        | 48/67          | 11.5 (5.60, 23.7)        |                |                          |
| Synergy index (95% CI)    |                                                 |                          |                |                          |                | 1.17 (0.61, 2.24)        |
| Duration of GERD symptoms | Duration of GERD combined with <i>H. pylori</i> |                          |                |                          |                |                          |
|                           | Negative                                        |                          | Positive       |                          |                |                          |
|                           | Controls/cases                                  | OR <sup>5</sup> (95% CI) | Controls/cases | OR <sup>5</sup> (95% CI) |                |                          |
| Never                     | 148/27                                          | 1.00 (Ref)               | 87/13          | 0.80 (0.39, 1.64)        |                |                          |
| < 20 years                | 81/70                                           | 4.83 (2.86, 8.16)        | 38/18          | 2.61 (1.29, 5.28)        |                |                          |
| ≥ 20 years                | 54/92                                           | 10.6 (6.11, 18.4)        | 26/10          | 2.11 (0.90, 4.92)        |                |                          |
| Synergy index (95% CI)    |                                                 |                          |                |                          |                | 0.12 (0.03, 0.53)        |
| Duration of GERD symptoms | Duration of GERD combined with PPIs             |                          |                |                          |                |                          |
|                           | Never used PPIs                                 |                          | Ever used PPIs |                          |                |                          |
|                           | Controls/cases                                  | OR <sup>5</sup> (95% CI) | Controls/cases | OR <sup>5</sup> (95% CI) |                |                          |
| Never                     | 228/28                                          | 1.00 (Ref)               | 13/13          | 8.07 (3.37, 19.4)        |                |                          |
| < 20 years                | 80/19                                           | 1.98 (1.04, 3.75)        | 43/69          | 13.0 (7.46, 22.5)        |                |                          |
| ≥ 20 years                | 40/18                                           | 3.64 (1.81, 7.31)        | 43/89          | 19.2 (11.0, 33.4)        |                |                          |
| Synergy index (95% CI)    |                                                 |                          |                |                          |                | 1.87 (0.84, 4.17)        |

BE, Barrett’s esophagus; GERD, gastroesophageal reflux disease.

<sup>1</sup> Heartburn or acid regurgitation symptoms in the 10 years prior to diagnosis.

<sup>2</sup> Adjusted for age, sex, education, cumulative smoking history, average alcohol consumption, and use of aspirin or other NSAIDs.

<sup>3</sup> Adjusted for age, sex, education, body mass index, average alcohol consumption, and use of aspirin or other NSAIDs.

<sup>4</sup> Adjusted for age, education, cumulative smoking history, body mass index, and average alcohol consumption.

<sup>5</sup> Adjusted for age, education, cumulative smoking history, body mass index, average alcohol consumption, and use of aspirin or other NSAIDs.

**Supplementary Table 6:** Odds ratios for Barrett’s esophagus associated with age at onset of symptoms of GERD<sup>1</sup> combined with BMI category or smoking or NSAID use or PPI use

| Age at onset of GERD combined with BMI |                   |                          |                |                          |                |                          |
|----------------------------------------|-------------------|--------------------------|----------------|--------------------------|----------------|--------------------------|
| Age at onset of GERD symptoms          | BMI < 25          |                          | BMI 25-29.9    |                          | BMI ≥ 30       |                          |
|                                        | Controls/cases    | OR <sup>2</sup> (95% CI) | Controls/cases | OR <sup>2</sup> (95% CI) | Controls/cases | OR <sup>2</sup> (95% CI) |
| Never                                  | 44/7              | 1.00 (Ref)               | 86/10          | 0.77 (0.27, 2.19)        | 111/24         | 1.43 (0.56, 3.62)        |
| ≥ GERD age <30 years                   | 16/23             | 9.63 (3.35, 27.7)        | 52/48          | 6.27 (2.54, 15.4)        | 73/61          | 5.58 (2.31, 13.5)        |
| ≥ GERD age ≥ 30 years                  | 4/4               | 6.29 (1.26, 31.5)        | 5/20           | 26.9 (7.43, 97.6)        | 9/21           | 15.3 (4.94, 47.6)        |
| Synergy index (95% CI)                 | 2.51 (0.43, 14.7) |                          |                |                          |                |                          |

  

| Age at onset of GERD combined with smoking status |                   |                          |                |                          |
|---------------------------------------------------|-------------------|--------------------------|----------------|--------------------------|
| Age at onset of GERD symptoms                     | Never smoker      |                          | Ever smoker    |                          |
|                                                   | Controls/cases    | OR <sup>3</sup> (95% CI) | Controls/cases | OR <sup>3</sup> (95% CI) |
| Never                                             | 65/9              | 1.00 (Ref)               | 176/31         | 1.27 (0.57, 2.86)        |
| ≥ GERD age <30 years                              | 31/27             | 6.41 (2.67, 15.4)        | 107/105        | 7.43 (3.46, 16.0)        |
| ≥ GERD age ≥ 30 years                             | 5/12              | 18.8 (5.26, 67.4)        | 13/33          | 18.3 (7.03, 47.7)        |
| Synergy index (95% CI)                            | 0.96 (0.26, 3.54) |                          |                |                          |

  

| Age at onset of GERD combined with NSAIDs use |                    |                          |                |                          |
|-----------------------------------------------|--------------------|--------------------------|----------------|--------------------------|
| Age at onset of GERD symptoms                 | Did not use NSAIDs |                          | Used NSAIDs    |                          |
|                                               | Controls/cases     | OR <sup>4</sup> (95% CI) | Controls/cases | OR <sup>4</sup> (95% CI) |
| Never                                         | 91/12              | 1.00 (Ref)               | 150/29         | 1.52 (0.74, 3.15)        |
| ≥ GERD age <30 years                          | 0/0                | -                        | 141/132        | 7.50 (3.90, 14.2)        |
| ≥ GERD age ≥ 30 years                         | 5/16               | 26.7 (8.09, 88.0)        | 13/29          | 17.3 (7.01, 42.6)        |
| Synergy index (95% CI)                        | 0.62 (0.18, 2.21)  |                          |                |                          |

  

| Age at onset of GERD combined with <i>H. pylori</i> |                   |                          |                |                          |
|-----------------------------------------------------|-------------------|--------------------------|----------------|--------------------------|
| Age at onset of GERD symptoms                       | Negative          |                          | Positive       |                          |
|                                                     | Controls/cases    | OR <sup>5</sup> (95% CI) | Controls/cases | OR <sup>5</sup> (95% CI) |
| Never                                               | 148/27            | 1.00 (Ref)               | 87/13          | 0.79 (0.39, 1.63)        |
| ≥ GERD age 30-79 years                              | 96/112            | 6.74 (4.08, 11.1)        | 41/16          | 2.15 (1.05, 4.42)        |
| ≥ GERD age <30 years                                | 12/38             | 18.7 (8.57, 40.8)        | 5/6            | 6.01 (1.69, 21.4)        |
| Synergy index (95% CI)                              | 0.29 (0.06, 1.43) |                          |                |                          |

  

| Age at onset of GERD combined with PPIs |                   |                          |                |                          |
|-----------------------------------------|-------------------|--------------------------|----------------|--------------------------|
| Age at onset of GERD symptoms           | Never used PPIs   |                          | Ever used PPIs |                          |
|                                         | Controls/cases    | OR <sup>5</sup> (95% CI) | Controls/cases | OR <sup>5</sup> (95% CI) |
| Never                                   | 228/28            | 1.00 (Ref)               | 13/13          | 7.90 (3.30, 18.9)        |
| ≥ GERD age 30-79 years                  | 72/22             | 2.47 (1.32, 4.61)        | 69/110         | 13.6 (8.23, 22.6)        |
| ≥ GERD age <30 years                    | 8/8               | 8.12 (2.76, 24.0)        | 10/37          | 31.1 (13.9, 69.7)        |
| Synergy index (95% CI)                  | 2.15 (0.77, 6.02) |                          |                |                          |

BE, Barrett’s esophagus; GERD, gastroesophageal reflux disease.

<sup>1</sup> Heartburn or acid regurgitation symptoms in the 10 years prior to diagnosis.

<sup>2</sup> Adjusted for age, sex, education, cumulative smoking history, average alcohol consumption, and use of aspirin or other NSAIDs.

<sup>3</sup> Adjusted for age, sex, education, body mass index, average alcohol consumption, and use of aspirin or other NSAIDs.

<sup>4</sup> Adjusted for age, education, cumulative smoking history, body mass index, and average alcohol consumption.

<sup>5</sup> Adjusted for age, education, cumulative smoking history, body mass index, average alcohol consumption, and use of aspirin or other NSAIDs.
