# Supplementary material
Source: PubMed Central journal article supplement (PMC3972036)

**Supplementary Figure 1: Enrollment flow diagram**

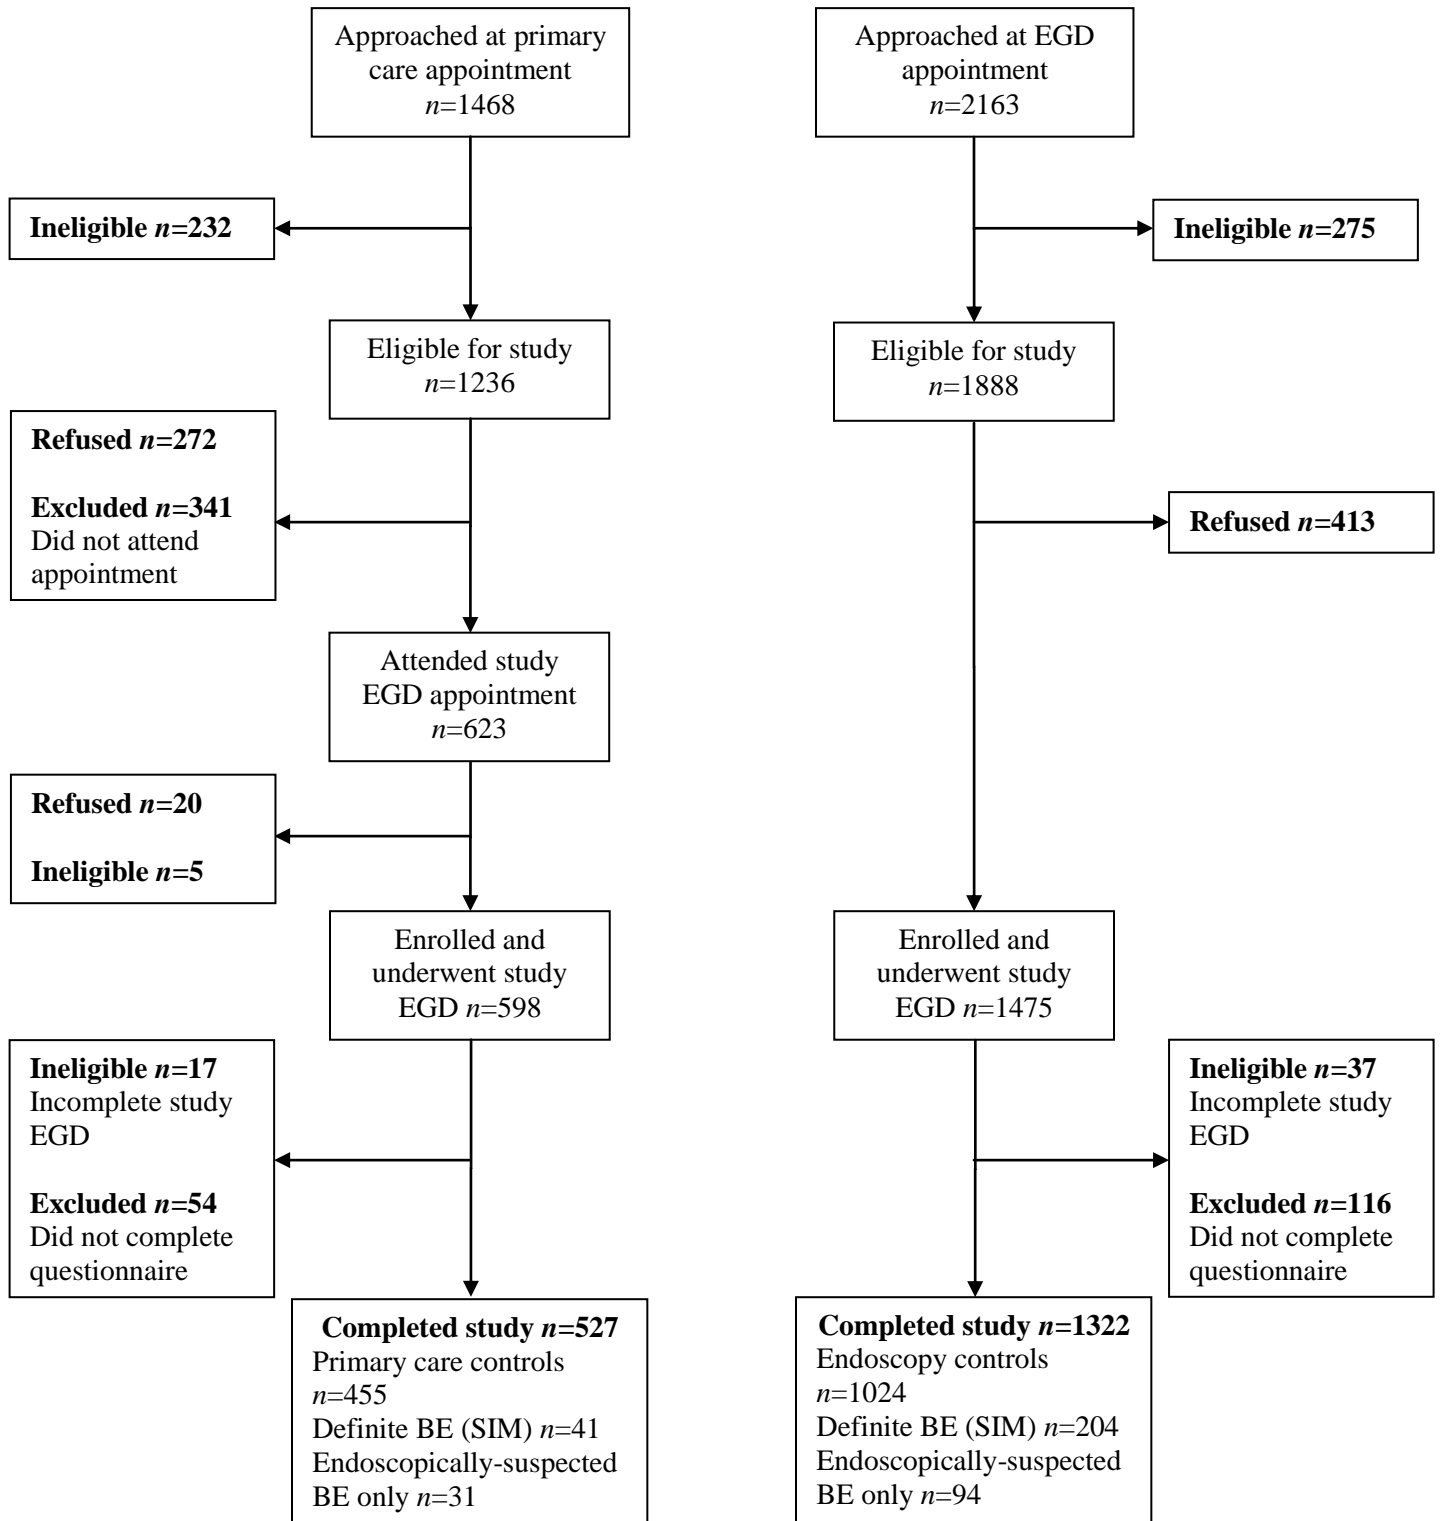

Supplement: NIHMS564487-supplement-Suppl-1.pdf [file NIHMS564487-supplement-Suppl-1.pdf]
